# Supplementary material
Source: Springer Nature journal article supplement (https://www.springermedizin.de/resource/supplementary/12936_2013_3152_MOESM7_ESM.pdf/9546286)
Supplement: MOESM7 [file 9546286]

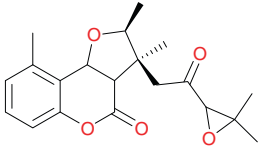

20-*Epi*-cycloisobrachycoumarinone  
epoxide (**72**)

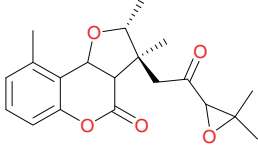

Cycloisobrachycoumarinone  
epoxide (**73**)

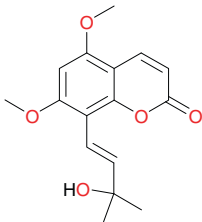

5,7-Dimethoxy-8-(3'-hydroxy-3'-  
methyl-1'-butene)coumarin (**74**)

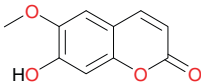

7-Hydroxy-6-methoxycoumarin (**75**)
